# Supplementary material for: NaKV4O9·2H2O: a new 2D magnetic compound with a 1/5-depleted square lattice
Source: Royal Society of Chemistry journal article supplement (doi:10.1039/c5dt04745e), 2016-01-01
Supplement: c5dt04745e2.pdf [file c5dt04745e2.pdf]

## Supporting Information

### **NaKV<sub>4</sub>O<sub>9</sub>·2H<sub>2</sub>O: A New 2D Magnetic Compound with 1/5-depleted Square Lattice**

Meiyan Cui<sup>a,b</sup>, Zhangzhen He<sup>a,\*</sup>, Nannan Wang<sup>a</sup>, Yingying Tang<sup>a</sup>, Wenbin Guo<sup>a</sup>,  
Suyun Zhang<sup>a</sup>, Lin Wang<sup>a</sup>, and Hongping Xiang<sup>a</sup>

<sup>a</sup>State Key Laboratory of Structural Chemistry, Fujian Institute of Research on the Structure of Matter, Chinese Academy of Sciences, Fuzhou, Fujian 350002, China.

<sup>b</sup>University of the Chinese Academy of Sciences, Beijing, 100039, P. R. China.

\*E-mail: [hezz@fjirsm.ac.cn](mailto:hezz@fjirsm.ac.cn)

**Figure S1.** The positions of alkaline, alkaline-earth, or organic cations in the interlayer space of MV<sub>4</sub>O<sub>9</sub>/A<sub>2</sub>V<sub>2</sub>O<sub>9</sub> family with a unique spin-lattice.

**Figure S2.** The susceptibility fitted using a Bleaney Bowers equation.

**Table S1.** Atomic coordinates and equivalent isotropic displacement parameters for NaKV<sub>4</sub>O<sub>9</sub>·2H<sub>2</sub>O.

**Table S2.** Anisotropic displacement parameters for NaKV<sub>4</sub>O<sub>9</sub>·2H<sub>2</sub>O.

**Table S3.** Bond lengths and angles for NaKV<sub>4</sub>O<sub>9</sub>·2H<sub>2</sub>O.

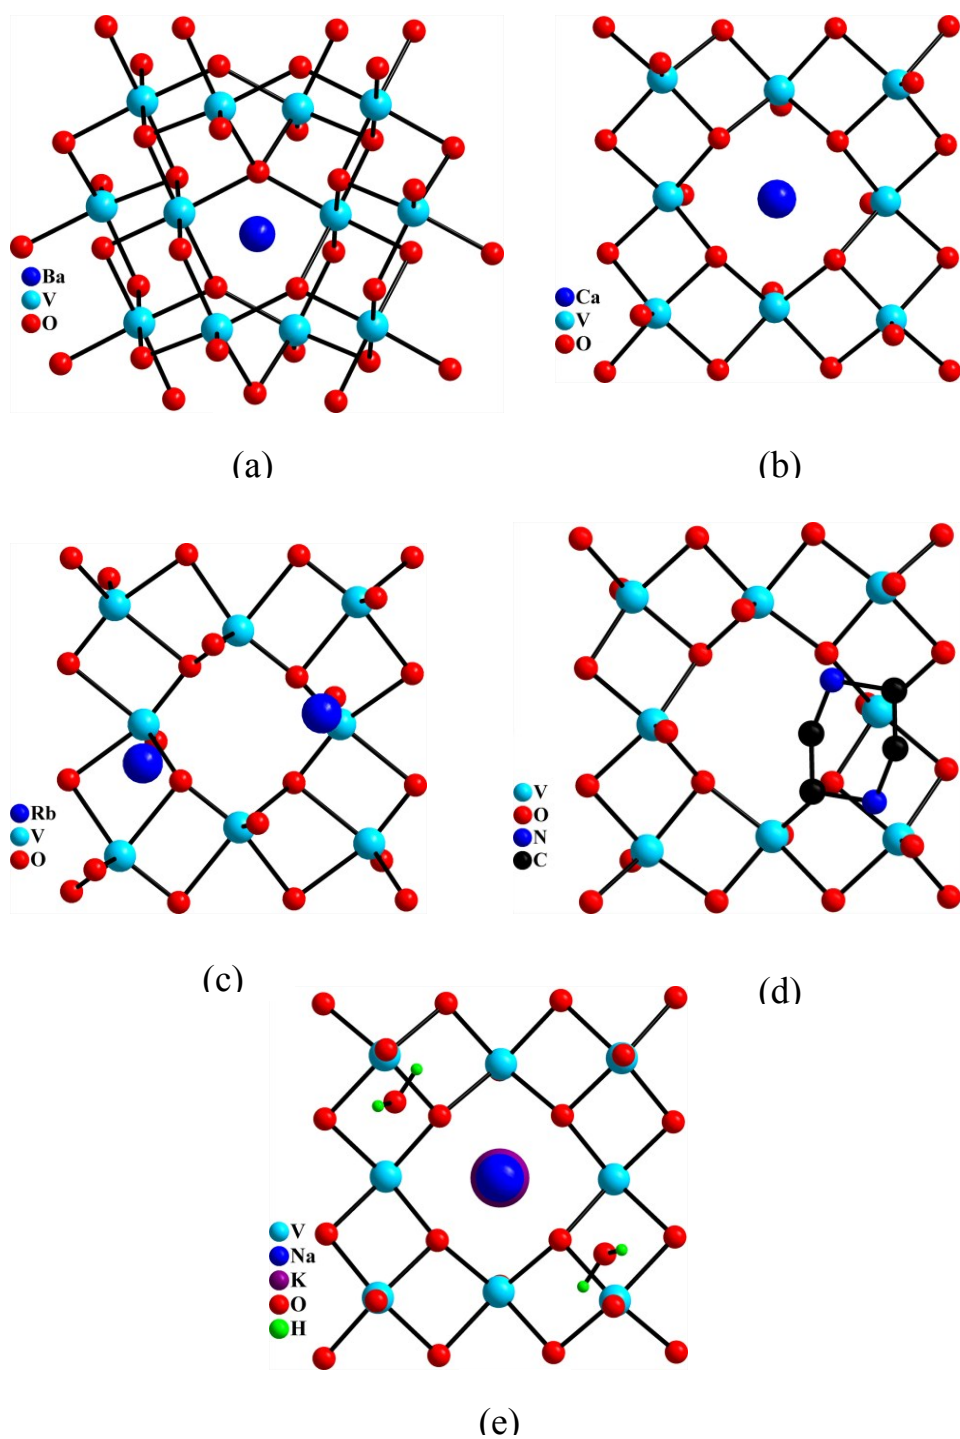

**Figure S1.** The positions of alkaline, alkaline-earth, or organic cations in the interlayer space of  $MV_4O_9/A_2V_2O_9$  family with a unique spin-lattice for (a)  $BaV_4O_9$ , (b)  $Ca/SrV_4O_9$ , (c)  $Rb_2/Cs_2V_4O_9$ , (d)  $[H_2N(CH_2)_4NH_2]V_4O_9$ , and (e)  $NaKV_4O_9 \cdot 2H_2O$ .

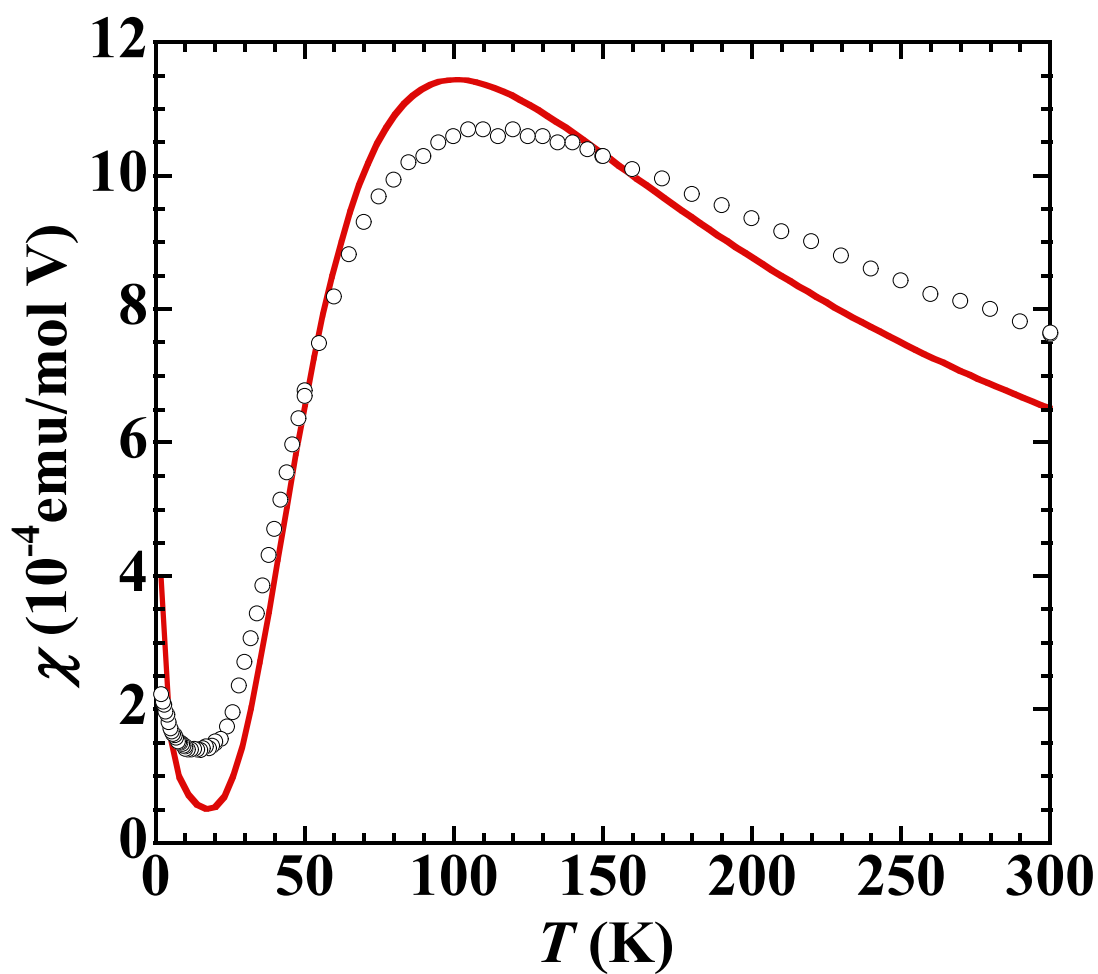

**Figure S2.** The susceptibility fitted using a Bleaney Bowers equation. The red line is a fit using a Bleaney Bowers equation expressed as  $\chi_{\text{raw}} = Ng^2\mu_B^2/kT[3+\exp(\Delta/T)] + C'/(T-\theta') + \chi_0$ .

**Table S1.** Atomic coordinates ( $\times 10^4$ ) and equivalent isotropic displacement parameters ( $\text{\AA}^2 \times 10^3$ ) for  $\text{NaKV}_4\text{O}_9 \cdot 2\text{H}_2\text{O}$ .  $U(\text{eq})$  is defined as one third of the trace of the orthogonalized  $U_{ij}$  tensor.

| atom  | x       | y       | z       | $U(\text{eq})$ |
|-------|---------|---------|---------|----------------|
| V(1)  | 2068(1) | 2102(1) | 8436(1) | 10(1)          |
| V(2)  | 973(1)  | 2954(1) | 5384(1) | 10(1)          |
| Na    | 5000    | 6524(2) | 2500    | 22(1)          |
| K     | 0       | 4871(1) | 2500    | 26(1)          |
| O(1)  | 3947(3) | 2515(2) | 9608(3) | 13(1)          |
| O(2)  | 2913(3) | 2541(2) | 6450(3) | 12(1)          |
| O(3)  | 0       | 2584(3) | 7500    | 13(1)          |
| O(4)  | 2084(4) | 1064(2) | 8345(3) | 20(1)          |
| O(5)  | 960(4)  | 3992(2) | 5230(3) | 22(1)          |
| H(6A) | 3753    | 4939    | 3278    | 55(1)          |
| H(6B) | 3089    | 5405    | 4534    | 55(1)          |

**Table S2.** Anisotropic displacement parameters ( $\text{\AA}^2 \times 10^3$ ) for  $\text{NaKV}_4\text{O}_9 \cdot 2\text{H}_2\text{O}$ . The anisotropic displacement factor exponent takes the form:  $-2 \pi^2 [ h^2 a^{*2} U_{11} + \dots + 2 h k a^* b^* U_{12} ]$ .

| atom | U11   | U22   | U33   | U23    | U13   | U12    |
|------|-------|-------|-------|--------|-------|--------|
| V(1) | 8(1)  | 17(1) | 5(1)  | -1(1)  | -1(1) | 0(1)   |
| V(2) | 7(1)  | 17(1) | 7(1)  | 1(1)   | -1(1) | 0(1)   |
| Na   | 19(1) | 28(1) | 20(1) | 0      | 3(1)  | 0      |
| K    | 32(1) | 28(1) | 18(1) | 0      | 1(1)  | 0      |
| O(1) | 8(1)  | 27(2) | 3(1)  | -3(1)  | -2(1) | 1(1)   |
| O(2) | 7(1)  | 21(2) | 8(1)  | 0(1)   | 1(1)  | 1(1)   |
| O(3) | 8(2)  | 25(2) | 5(2)  | 0      | -1(1) | 0      |
| O(4) | 28(2) | 18(2) | 15(1) | -2(1)  | -2(1) | -2(1)  |
| O(5) | 26(2) | 19(2) | 20(1) | 0(1)   | 1(1)  | 1(1)   |
| O(6) | 70(3) | 35(2) | 32(2) | -11(2) | 19(2) | -20(2) |

**Table S3.** Bond lengths [Å] and angles [deg] for NaKV<sub>4</sub>O<sub>9</sub>·2H<sub>2</sub>O.

|                    |            |                  |            |
|--------------------|------------|------------------|------------|
| V(1)-O(4)          | 1.609(3)   | V(1)-O(2)        | 1.932(3)   |
| V(1)-O(1)          | 1.937(3)   | V(1)-O(1)#1      | 1.938(3)   |
| V(1)-O(3)          | 2.016(2)   | V(2)-O(5)        | 1.611(3)   |
| V(2)-O(1)#5        | 1.931(3)   | V(2)-O(2)        | 1.936(3)   |
| V(2)-O(2)#4        | 1.953(3)   | V(2)-O(3)        | 2.033(2)   |
| Na-O(6)            | 2.327(4)   | Na-O(6)#8        | 2.327(4)   |
| Na-O(2)#3          | 2.412(3)   | Na-O(2)#9        | 2.412(3)   |
| Na-O(1)#9          | 2.471(3)   | Na-O(1)#3        | 2.471(3)   |
| K-O(5)#7           | 2.714(4)   | K-O(5)#9         | 2.714(4)   |
| K-O(5)#12          | 2.771(4)   | K-O(5)           | 2.771(4)   |
| K-O(4)#5           | 2.901(4)   | K-O(4)#4         | 2.901(4)   |
| K-O(6)             | 3.026(5)   | K-O(6)#12        | 3.026(5)   |
| O(4)-V(1)-O(2)     | 107.87(14) | O(4)-V(1)-O(1)   | 110.26(14) |
| O(2)-V(1)-O(1)     | 91.53(12)  | O(4)-V(1)-O(1)#1 | 110.44(14) |
| O(2)-V(1)-O(1)#1   | 141.40(15) | O(1)-V(1)-O(1)#1 | 79.70(12)  |
| O(4)-V(1)-O(3)     | 110.99(15) | O(2)-V(1)-O(3)   | 81.13(10)  |
| O(1)-V(1)-O(3)     | 138.38(16) | O(1)#1-V(1)-O(3) | 81.10(10)  |
| O(5)-V(2)-O(1)#5   | 110.04(14) | O(5)-V(2)-O(2)   | 111.76(14) |
| O(1)#5-V(2)-O(2)   | 137.93(14) | O(5)-V(2)-O(2)#4 | 109.30(14) |
| O(1)#5-V(2)-O(2)#4 | 90.03(12)  | O(2)-V(2)-O(2)#4 | 80.77(12)  |
| O(5)-V(2)-O(3)     | 110.37(15) | O(1)#5-V(2)-O(3) | 80.83(10)  |
| O(2)-V(2)-O(3)     | 80.57(10)  | O(2)#4-V(2)-O(3) | 140.05(15) |
| O(6)-Na-O(6)#8     | 87.6(2)    | O(6)-Na-O(2)#3   | 135.69(13) |
| O(6)#8-Na-O(2)#3   | 98.70(15)  | O(6)-Na-O(2)#9   | 98.70(15)  |
| O(6)#8-Na-O(2)#9   | 135.69(13) | O(2)#3-Na-O(2)#9 | 106.21(18) |
| O(6)-Na-O(1)#9     | 87.81(13)  | O(6)#8-Na-O(1)#9 | 155.14(12) |
| O(2)#3-Na-O(1)#9   | 68.45(11)  | O(2)#9-Na-O(1)#9 | 69.17(11)  |
| O(6)-Na-O(1)#3     | 155.14(12) | O(6)#8-Na-O(1)#3 | 87.81(13)  |
| O(2)#3-Na-O(1)#3   | 69.17(11)  | O(2)#9-Na-O(1)#3 | 68.45(11)  |
| O(1)#9-Na-O(1)#3   | 105.97(17) | O(5)#7-K-O(5)#9  | 99.11(15)  |
| O(5)#7-K-O(5)#12   | 144.41(12) | O(5)#9-K-O(5)#12 | 79.86(12)  |
| O(5)#7-K-O(5)      | 79.86(12)  | O(5)#9-K-O(5)    | 144.41(12) |
| O(5)#12-K-O(5)     | 121.17(15) | O(5)#7-K-O(4)#5  | 84.54(10)  |
| O(5)#9-K-O(4)#5    | 137.90(9)  | O(5)#12-K-O(4)#5 | 73.97(10)  |
| O(5)-K-O(4)#5      | 77.67(10)  | O(5)#7-K-O(4)#4  | 137.90(9)  |
| O(5)#9-K-O(4)#4    | 84.54(10)  | O(5)#12-K-O(4)#4 | 77.67(10)  |
| O(5)-K-O(4)#4      | 73.97(10)  | O(4)#5-K-O(4)#4  | 120.19(14) |
| O(5)#7-K-O(6)      | 83.41(11)  | O(5)#9-K-O(6)    | 74.84(11)  |
| O(5)#12-K-O(6)     | 129.20(9)  | O(5)-K-O(6)      | 69.68(10)  |
| O(4)#5-K-O(6)      | 146.68(10) | O(4)#4-K-O(6)    | 56.88(11)  |
| O(5)#7-K-O(6)#12   | 74.84(11)  | O(5)#9-K-O(6)#12 | 83.41(11)  |

|                   |            |                  |            |
|-------------------|------------|------------------|------------|
| O(5)#12-K-O(6)#12 | 69.68(10)  | O(5)-K-O(6)#12   | 129.20(9)  |
| O(4)#5-K-O(6)#12  | 56.88(11)  | O(4)#4-K-O(6)#12 | 146.68(10) |
| O(6)-K-O(6)#12    | 146.28(17) |                  |            |

Symmetry transformations used to generate equivalent atoms:

- |                             |                           |
|-----------------------------|---------------------------|
| #1 $-x+1/2, -y+1/2, -z+2$   | #2 $-x, y, -z+3/2$        |
| #3 $-x+1, -y+1, -z+1$       | #4 $-x+1/2, -y+1/2, -z+1$ |
| #5 $x-1/2, -y+1/2, z-1/2$   | #6 $x-1/2, y-1/2, z$      |
| #7 $-x, -y+1, -z+1$         | #8 $-x+1, y, -z+1/2$      |
| #9 $x, -y+1, z-1/2$         | #10 $x+1/2, y+1/2, z$     |
| #11 $-x+1/2, y+1/2, -z+1/2$ | #12 $-x, y, -z+1/2$       |
| #13 $x+1/2, -y+1/2, z+1/2$  |                           |
